# Supplementary material for: Integrative Metabolomic and Transcriptomic Analyses Reveal the Mechanism of Petal Blotch Formation in Rosa persica
Source: MDPI journal article supplement (doi:10.3390/ijms25074030), 2024-04-04
Supplement: s1 [file s1]

Supplementary Figures

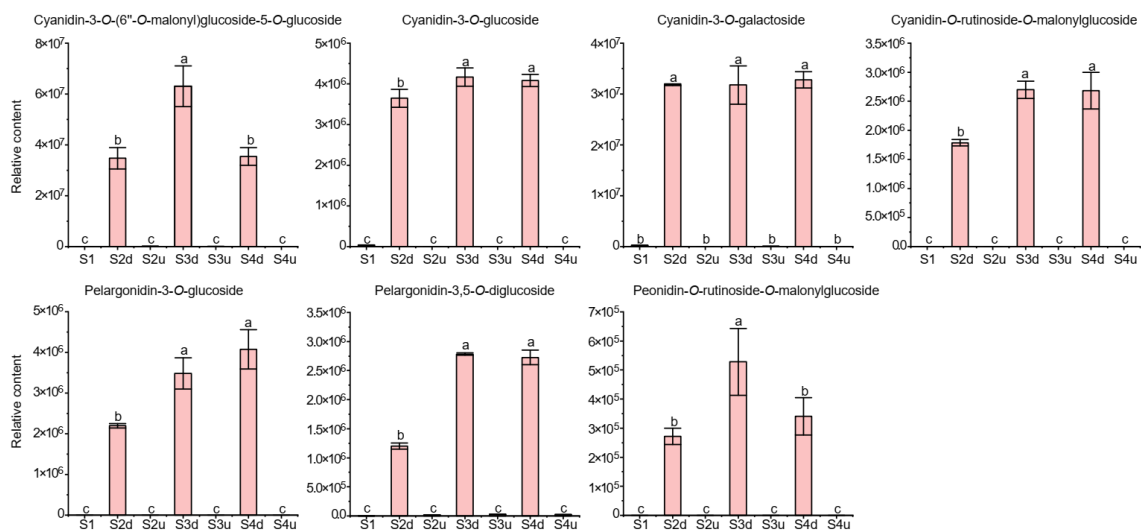

**Figure S1.** The relative content of seven anthocyanins in the blotch and non-blotch petal parts of petals in *R. persica*.

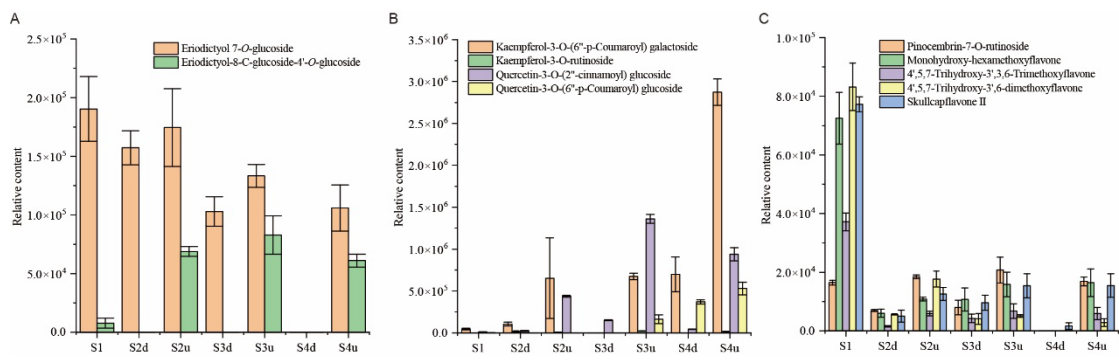

**Figure S2.** The relative content of 11 DAFs in the comparisons of S3u vs. S3d and S4u vs. S4d in *R. persica*. (A): The relative content of flavanones. (B): The relative content of flavonols. (C): The relative content of flavones.

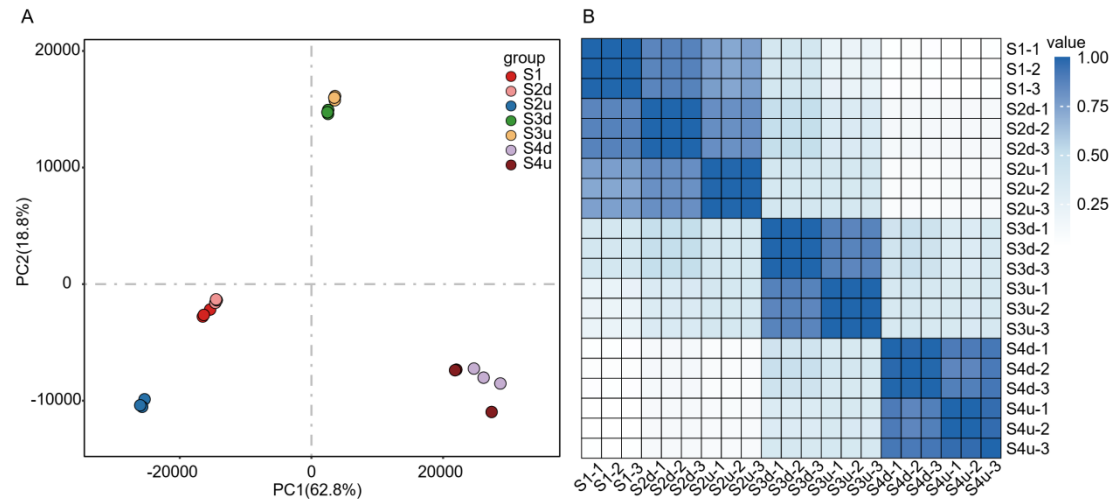

**Figure S3.** RNA-seq analysis of petal blotch and non-blotch samples across 21 sequencing libraries. **(A):** Principal component analysis of gene expression profile across samples. **(B):** Pearson correlation analysis of RNA samples across 21 sequencing libraries.

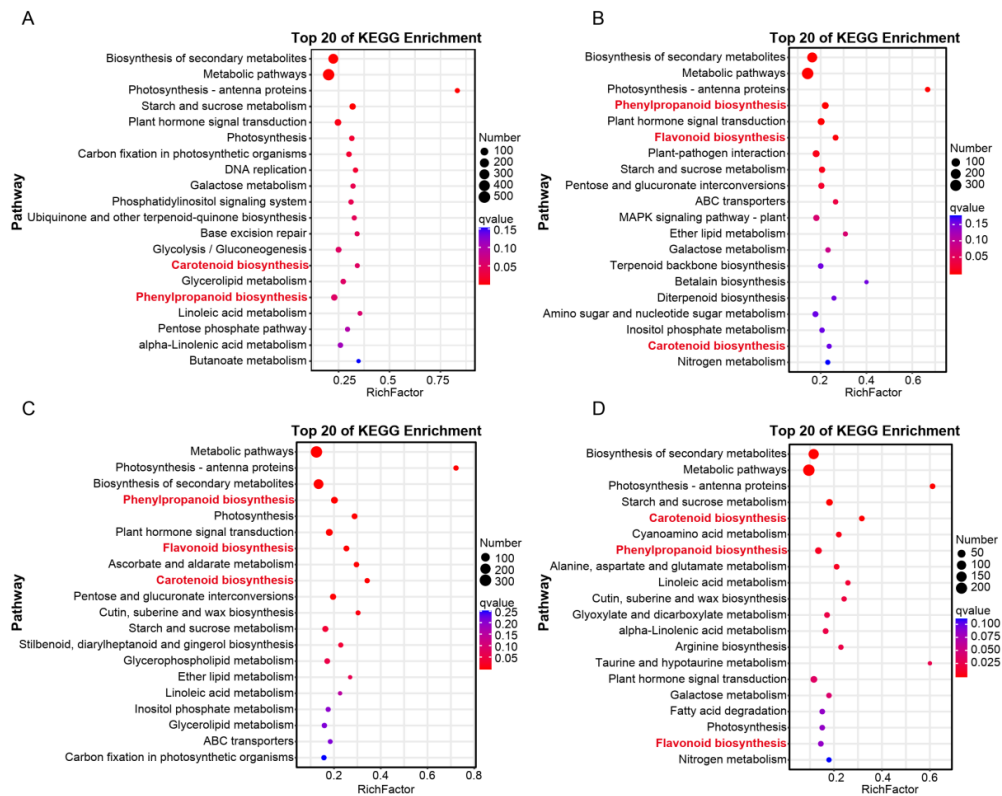

**Figure S4.** KEGG enrichment analysis of DEGs identified in four comparisons. **(A):** S1 vs. S2d. **(B):** S2u vs. S2d. **(C):** S3u vs. S3d. **(D):** S4u vs. S4d.

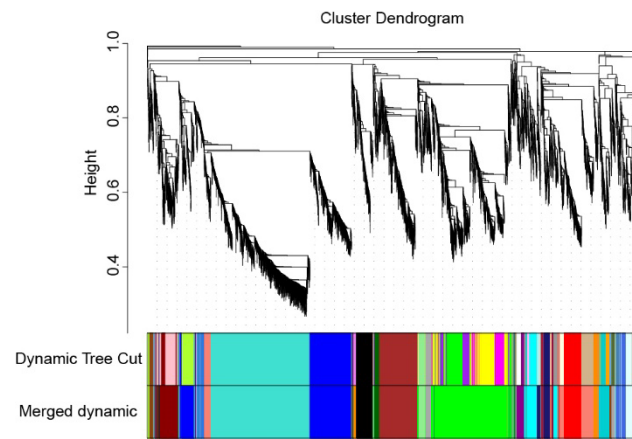

**Figure S5.** Hierarchical clustering dendrogram of 20 gene expression modules

## Supplementary Tables

**Table S1.** Differentially accumulated flavonoids between S1 and S2d.

| Index      | Compounds                                           | Class                | S1-1   | S1-2   | S1-3   | S2d-1    | S2d-2    | S2d-3    | Log <sub>2</sub> FC | VIP   | Type |
|------------|-----------------------------------------------------|----------------------|--------|--------|--------|----------|----------|----------|---------------------|-------|------|
| pme3392    | Pelargonidin-3-O-glucoside                          | Anthocyanins         | 9      | 9      | 9      | 2237700  | 2140100  | 2210200  | 17.897              | 2.178 | up   |
| P4032      | Cyanidin-O-rutinoside-O-malonylglucoside            | Anthocyanins         | 9      | 9      | 9      | 1728000  | 1793100  | 1842400  | 17.600              | 2.160 | up   |
| P4329      | Peonidin-O-rutinoside-O-malonylglucoside            | Anthocyanins         | 9      | 9      | 9      | 241770   | 297100   | 275640   | 14.881              | 1.985 | up   |
| pmb0541    | Cyanidin-3-O-(6"-O-malonyl) glucoside-5-O-glucoside | Anthocyanins         | 36216  | 18013  | 16599  | 30223000 | 38450000 | 35650000 | 10.524              | 1.675 | up   |
| pme1793    | Pelargonidin-3,5-O-diglucoside                      | Anthocyanins         | 1241   | 1821   | 858    | 1257200  | 1201200  | 1146500  | 9.845               | 1.619 | up   |
| pmf0027    | Cyanidin-3-O-galactoside                            | Anthocyanins         | 279570 | 233230 | 239970 | 31798000 | 31682000 | 32052000 | 6.988               | 1.361 | up   |
| pmb0550    | Cyanidin-3-O-glucoside                              | Anthocyanins         | 32345  | 38713  | 30723  | 3424500  | 3863700  | 3658200  | 6.749               | 1.338 | up   |
| HJN041     | Epicatechin glucoside                               | Catechin derivatives | 9      | 9      | 9      | 155130   | 168800   | 158920   | 14.126              | 1.935 | up   |
| pmb0628    | Eriodictyol-8-C-glucoside-4'-O-glucoside            | Flavanone            | 3061   | 11560  | 8864   | 9        | 9        | 9        | -9.765              | 1.586 | down |
| mws0463    | Hesperetin                                          | Flavanone            | 9      | 9      | 9      | 6398     | 5933     | 7028     | 9.486               | 1.585 | up   |
| mws1174    | 3-O-Acetylpinobanksin                               | Flavanonol           | 16647  | 18083  | 11190  | 9        | 9        | 9        | -10.732             | 1.683 | down |
| pmb2979    | Hesperetin-7-O-(6"-malonyl) glucoside               | Flavanonol           | 2001   | 3184   | 4424   | 116800   | 128070   | 118960   | 5.243               | 1.182 | up   |
| Lmjp005224 | 4',5,7-Trihydroxy-3',3,6-Trimethoxyflavone          | Flavone              | 33739  | 38322  | 39495  | 1497     | 1844     | 1358     | -4.569              | 1.100 | down |
| Zmhp004269 | Skullcapflavone II                                  | Flavone              | 78977  | 74258  | 78470  | 4051     | 7358     | 3685     | -3.940              | 1.025 | down |
| pmp000004  | 4',5,7-Trihydroxy-3',6-dimethoxyflavone             | Flavone              | 73934  | 89037  | 86651  | 5441     | 5809     | 5634     | -3.886              | 1.014 | down |
| pmp000786  | 3',5-Dihydroxy-4',6,7-trimethoxyflavone             | Flavone              | 16173  | 21006  | 18736  | 1846     | 593      | 1564     | -3.804              | 1.007 | down |
| mws1661    | Diosmin                                             | Flavone              | 9      | 9      | 9      | 337560   | 306580   | 328650   | 15.137              | 2.003 | up   |
| mws0920    | Tricetin                                            | Flavone              | 9      | 9      | 9      | 116900   | 148520   | 129860   | 13.838              | 1.914 | up   |
| pmb0592    | Chrysoeriol-7-O-rutinoside-5-O-glucoside            | Flavone              | 9      | 9      | 9      | 133650   | 109410   | 119860   | 13.714              | 1.906 | up   |
| Hmjn004446 | Luteolin-7-O-(6"-caffeoyl) rhamnoside               | Flavone              | 133310 | 119150 | 121550 | 2219700  | 2100500  | 2158200  | 4.114               | 1.044 | up   |
| Hmhp005228 | Norwogonin                                          | Flavone              | 33739  | 30732  | 27063  | 422030   | 485330   | 463680   | 3.905               | 1.017 | up   |
| mws1608    | Luteolin-6-C-glucoside                              | Flavone C-glycosides | 18263  | 20289  | 18823  | 9        | 9        | 9        | -11.053             | 1.711 | down |

|            |                                                        |                      |        |        |        |         |         |         |        |       |      |
|------------|--------------------------------------------------------|----------------------|--------|--------|--------|---------|---------|---------|--------|-------|------|
| pmb0672    | Apigenin-6-C-glucoside-7-O-(6"-feruloyl) glucoside     | Flavone C-glycosides | 9      | 9      | 9      | 111230  | 110400  | 119520  | 13.625 | 1.900 | up   |
| mws0988    | Rhamnetin                                              | Flavonol             | 7744   | 8808   | 8285   | 9       | 9       | 9       | -9.845 | 1.615 | down |
| Lmdp004267 | Quercetin-3-O-(6"-p-Coumaroyl) glucoside               | Flavonol             | 2480   | 2475   | 331    | 9       | 9       | 9       | -7.613 | 1.351 | down |
| Lmjp002867 | Kaempferol-3-O-neohesperidoside                        | Flavonol             | 9      | 9      | 9      | 9904800 | 9401300 | 9283600 | 20.014 | 2.303 | up   |
| Lmpp003268 | Kaempferol-3-O-rutinoside-7-O-glucoside                | Flavonol             | 9      | 9      | 9      | 5416700 | 4473000 | 4864850 | 19.060 | 2.247 | up   |
| Lmyn001269 | Kaempferol-3-O-sophoroside                             | Flavonol             | 9      | 9      | 9      | 673810  | 630110  | 629850  | 16.128 | 2.067 | up   |
| pmp001312  | 6-Hydroxykaempferol-3,7,6-O-triglycoside               | Flavonol             | 9      | 9      | 9      | 52964   | 51099   | 53020   | 12.506 | 1.820 | up   |
| pmn001644  | Quercetin-3-O-(2"-acetyl) glucuronide                  | Flavonol             | 9      | 9      | 9      | 46884   | 44419   | 46230   | 12.315 | 1.806 | up   |
| pmb0709    | Quercetin-7-O-(6"-malonyl) glucosyl-5-O-glucoside      | Flavonol             | 9      | 9      | 9      | 28152   | 29118   | 27850   | 11.622 | 1.755 | up   |
| Lmsn002815 | Kaempferol-3-O-rutinoside                              | Flavonol             | 9      | 9      | 9      | 14383   | 23543   | 17654   | 11.007 | 1.705 | up   |
| pmn001640  | Myricetin-3-O-arabinoside                              | Flavonol             | 9      | 9      | 9      | 15186   | 12312   | 14205   | 10.593 | 1.675 | up   |
| mws0919    | Kaempferol-3-O-rhamnoside (Afzelin)                    | Flavonol             | 9      | 9      | 9      | 10201   | 11946   | 10980   | 10.261 | 1.649 | up   |
| Hmcp002539 | Isorhamnetin-3-O-rhamnoside                            | Flavonol             | 9      | 9      | 9      | 8634    | 10420   | 8992    | 10.021 | 1.629 | up   |
| pmp001309  | 6-Hydroxykaempferol-7-O-glucoside                      | Flavonol             | 17396  | 29554  | 11179  | 1139100 | 1057500 | 1068500 | 5.812  | 1.247 | up   |
| Lmyp004052 | Quercetin-3-O-(6"-p-Coumaroyl) galactoside             | Flavonol             | 33628  | 31329  | 33550  | 1430400 | 1257300 | 1350960 | 5.358  | 1.191 | up   |
| mws0059    | Quercetin-3-O-rutinoside (Rutin)                       | Flavonol             | 162770 | 146930 | 144700 | 5719000 | 6083800 | 5890100 | 5.283  | 1.183 | up   |
| mws1290    | Kaempferol-3-O-(6"-p-coumaroyl) glucoside (Tiliroside) | Flavonol             | 347570 | 303160 | 317330 | 5685900 | 4976000 | 5402300 | 4.053  | 1.036 | up   |
| Hmjp003123 | Quercetin-5-O-glucuronide                              | Flavonol             | 9      | 9      | 9      | 9172000 | 8236800 | 8902500 | 19.894 | 2.296 | up   |
| pme0434    | Procyanidin B2                                         | Proanthocyanidins    | 9      | 9      | 9      | 56291   | 70259   | 62375   | 12.773 | 1.839 | up   |
| mws0836    | Procyanidin B1                                         | Proanthocyanidins    | 9      | 9      | 9      | 13794   | 10757   | 12543   | 10.424 | 1.661 | up   |

**Table S2.** Differentially accumulated flavonoids between S2u and S2d.

| Index   | Compounds                                | Class        | S2u-1 | S2u-2 | S2u-3 | S2d-1    | S2d-2    | S2d-3    | Log <sub>2</sub> FC | VIP   | Type |
|---------|------------------------------------------|--------------|-------|-------|-------|----------|----------|----------|---------------------|-------|------|
| pmf0027 | Cyanidin-3-O-galactoside                 | Anthocyanins | 9     | 9     | 9     | 31798000 | 31682000 | 32052000 | 21.755              | 2.671 | up   |
| pmb0550 | Cyanidin-3-O-glucoside                   | Anthocyanins | 9     | 9     | 9     | 3424500  | 3863700  | 3658200  | 18.629              | 2.472 | up   |
| pme3392 | Pelargonidin-3-O-glucoside               | Anthocyanins | 9     | 9     | 9     | 2237700  | 2140100  | 2210200  | 17.897              | 2.423 | up   |
| P4032   | Cyanidin-O-rutinoside-O-malonylglucoside | Anthocyanins | 9     | 9     | 9     | 1728000  | 1793100  | 1842400  | 17.600              | 2.403 | up   |

|            |                                                    |                      |         |         |         |          |          |          |         |       |      |
|------------|----------------------------------------------------|----------------------|---------|---------|---------|----------|----------|----------|---------|-------|------|
| P4329      | Peonidin-O-rutinoside-O-malonylglucoside           | Anthocyanins         | 9       | 9       | 9       | 241770   | 297100   | 275640   | 14.881  | 2.209 | up   |
| pmb0541    | Cyanidin-3-O-(6"-O-malonyl)glucoside-5-O-glucoside | Anthocyanins         | 83932   | 88481   | 80336   | 30223000 | 38450000 | 35650000 | 8.689   | 1.687 | up   |
| pme1793    | Pelargonidin-3,5-O-diglucoside                     | Anthocyanins         | 19674   | 19543   | 18184   | 1257200  | 1201200  | 1146500  | 5.973   | 1.400 | up   |
| HJN041     | Epicatechin glucoside                              | Catechin derivatives | 9       | 9       | 9       | 155130   | 168800   | 158920   | 14.126  | 2.152 | up   |
| pme0460    | Epicatechin                                        | Catechin derivatives | 90166   | 112210  | 121400  | 2728200  | 2215400  | 2501800  | 4.523   | 1.218 | up   |
| mws0034    | (-)-Epigallocatechin gallate                       | Catechin derivatives | 21635   | 19238   | 14920   | 9        | 9        | 9        | -11.013 | 1.899 | down |
| mws0463    | Hesperetin                                         | Flavanone            | 9       | 9       | 9       | 6398     | 5933     | 7028     | 9.486   | 1.763 | up   |
| pmb0628    | Eriodictyol-8-C-glucoside-4'-O-glucoside           | Flavanone            | 72220   | 70206   | 64213   | 9        | 9        | 9        | -12.902 | 2.057 | down |
| mws0744    | Dihydromyricetin                                   | Flavanonol           | 160430  | 142150  | 143380  | 9017     | 11514    | 11028    | -3.821  | 1.119 | down |
| mws1661    | Diosmin                                            | Flavone              | 9       | 9       | 9       | 337560   | 306580   | 328650   | 15.137  | 2.228 | up   |
| pmb0592    | Chrysoeriol-7-O-rutinoside-5-O-glucoside           | Flavone              | 9       | 9       | 9       | 133650   | 109410   | 119860   | 13.714  | 2.120 | up   |
| pma6640    | 3'-O-Methyltricetin-7-O-glucoside                  | Flavone              | 117270  | 70130   | 90246   | 1008900  | 1431800  | 1188900  | 3.708   | 1.100 | up   |
| pmb0672    | Apigenin-6-C-glucoside-7-O-(6"-feruloyl) glucoside | Flavone C-glycosides | 9       | 9       | 9       | 111230   | 110400   | 119520   | 13.625  | 2.114 | up   |
| mws1608    | Luteolin-6-C-glucoside                             | Flavone C-glycosides | 3679    | 3107    | 3226    | 9        | 9        | 9        | -8.535  | 1.672 | down |
| Lmmp003268 | Kaempferol-3-O-rutinoside-7-O-glucoside            | Flavonol             | 9       | 9       | 9       | 5416700  | 4473000  | 4864850  | 19.060  | 2.500 | up   |
| Lmyn001269 | Kaempferol-3-O-sophoroside                         | Flavonol             | 9       | 9       | 9       | 673810   | 630110   | 629850   | 16.128  | 2.300 | up   |
| Lmjp002867 | Kaempferol-3-O-neohesperidoside                    | Flavonol             | 171990  | 58977   | 26426   | 9904800  | 9401300  | 9283600  | 6.795   | 1.520 | up   |
| mws0059    | Quercetin-3-O-rutinoside (Rutin)                   | Flavonol             | 465540  | 386150  | 509840  | 5719000  | 6083800  | 5890100  | 3.700   | 1.102 | up   |
| Lmmp002963 | 6-C-Methylquercetin-3-O-rutinoside                 | Flavonol             | 9       | 9       | 9       | 57360    | 54295    | 58210    | 12.619  | 2.034 | up   |
| mws0988    | Rhamnetin                                          | Flavonol             | 89227   | 90534   | 90322   | 9        | 9        | 9        | -13.288 | 2.088 | down |
| mws1068    | Kaempferol                                         | Flavonol             | 191370  | 190570  | 188070  | 6636     | 4194     | 5230     | -5.149  | 1.301 | down |
| pme2954    | Quercetin                                          | Flavonol             | 5538700 | 5183400 | 5228800 | 681410   | 578770   | 640260   | -3.069  | 1.003 | down |
| Lmyp005328 | Quercetin-3-O-(2"-cinnamoyl) Glucoside             | Flavonol             | 432010  | 427450  | 453210  | 31445    | 19685    | 20565    | -4.194  | 1.175 | down |
| Lmhp002800 | 2'-Hydoxy,5-methoxyGenistein-4',7-O-diglucoside    | Isoflavone           | 366290  | 530870  | 467170  | 5720000  | 5945200  | 6065600  | 3.700   | 1.102 | up   |
| mws0836    | Procyanidin B1                                     | Proanthocyanidins    | 9       | 9       | 9       | 13794    | 10757    | 12543    | 10.424  | 1.848 | up   |
| pme0436    | Procyanidin B3                                     | Proanthocyanidins    | 4596    | 10078   | 6647    | 167080   | 139460   | 149860   | 4.420   | 1.207 | up   |
| pme0434    | Procyanidin B2                                     | Proanthocyanidins    | 5816    | 7630    | 3750    | 56291    | 70259    | 62375    | 3.458   | 1.065 | up   |

**Table S3.** Differentially accumulated flavonoids between S3u and S3d.

| Index      | Compounds                                           | Class                | S3u-1   | S3u-2   | S3u-3   | S3d-1    | S3d-2    | S3d-3    | Log <sub>2</sub> FC | VIP   | Type |
|------------|-----------------------------------------------------|----------------------|---------|---------|---------|----------|----------|----------|---------------------|-------|------|
| pmb0550    | Cyanidin-3-O-glucoside                              | Anthocyanins         | 9       | 9       | 9       | 4266400  | 3912600  | 4321900  | 18.821              | 2.649 | up   |
| P4032      | Cyanidin-O-rutinoside-O-malonylglucoside            | Anthocyanins         | 9       | 9       | 9       | 2859300  | 2562700  | 2673800  | 18.194              | 2.604 | up   |
| P4329      | Peonidin-O-rutinoside-O-malonylglucoside            | Anthocyanins         | 9       | 9       | 9       | 424090   | 508510   | 651720   | 15.841              | 2.428 | up   |
| pme3392    | Pelargonidin-3-O-glucoside                          | Anthocyanins         | 9       | 9       | 9       | 3168900  | 3910100  | 3373200  | 18.562              | 2.619 | up   |
| pmb0541    | Cyanidin-3-O-(6"-O-malonyl) glucoside-5-O-glucoside | Anthocyanins         | 71648   | 63492   | 59089   | 71929000 | 60711000 | 56457000 | 9.927               | 1.924 | up   |
| pmf0027    | Cyanidin-3-O-galactoside                            | Anthocyanins         | 58694   | 58993   | 63096   | 35415000 | 32028000 | 27914000 | 9.043               | 1.836 | up   |
| pme1793    | Pelargonidin-3,5-O-diglucoside                      | Anthocyanins         | 27499   | 30828   | 25174   | 2775000  | 2768800  | 2806000  | 6.644               | 1.574 | up   |
| HJN041     | Epicatechin glucoside                               | Catechin derivatives | 9       | 9       | 9       | 594910   | 597360   | 611930   | 16.028              | 2.445 | up   |
| pme0460    | Epicatechin                                         | Catechin derivatives | 77830   | 58450   | 71342   | 4522600  | 4526400  | 4301600  | 6.007               | 1.497 | up   |
| mws0054    | Catechin                                            | Catechin derivatives | 268560  | 241740  | 288240  | 2151300  | 2188100  | 1904900  | 2.967               | 1.051 | up   |
| pmb0628    | Eriodictyol-8-C-glucoside-4'-O-glucoside            | Flavanone            | 95931   | 64602   | 88042   | 9        | 9        | 9        | -13.168             | 2.214 | down |
| mws1661    | Diosmin                                             | Flavone              | 9       | 9       | 9       | 3678400  | 4684000  | 3371400  | 18.729              | 2.641 | up   |
| pmb0592    | Chrysoeriol-7-O-rutinoside-5-O-glucoside            | Flavone              | 9       | 9       | 9       | 331900   | 363440   | 493450   | 15.426              | 2.396 | up   |
| pmb0672    | Apigenin-6-C-glucoside-7-O-(6"-feruloyl) glucoside  | Flavone C-glycosides | 9       | 9       | 9       | 291590   | 319520   | 306310   | 15.052              | 2.369 | up   |
| Lmjp002867 | Kaempferol-3-O-neohesperidoside                     | Flavonol             | 9       | 9       | 9       | 61334000 | 69130000 | 63278000 | 22.775              | 2.914 | up   |
| Lmpp003268 | Kaempferol-3-O-rutinoside-7-O-glucoside             | Flavonol             | 9       | 9       | 9       | 13746000 | 12442000 | 14733000 | 20.531              | 2.767 | up   |
| Lmyn001269 | Kaempferol-3-O-sophoroside                          | Flavonol             | 9       | 9       | 9       | 834070   | 862610   | 772030   | 16.480              | 2.479 | up   |
| Lmyp004318 | Kaempferol-3-O-(6"-p-Coumaroyl) galactoside         | Flavonol             | 665010  | 716580  | 641430  | 9        | 9        | 9        | -16.193             | 2.457 | down |
| Lmdp004267 | Quercetin-3-O-(6"-p-Coumaroyl) glucoside            | Flavonol             | 124020  | 143900  | 222140  | 9        | 9        | 9        | -14.148             | 2.292 | down |
| Lmsn002815 | Kaempferol-3-O-rutinoside                           | Flavonol             | 22115   | 24047   | 19029   | 9        | 9        | 9        | -11.237             | 2.046 | down |
| Lmyp005328 | Quercetin-3-O-(2"-cinnamoyl) glucoside              | Flavonol             | 1318900 | 1420300 | 1342800 | 152210   | 144520   | 153960   | -3.179              | 1.089 | down |
| mws0836    | Procyanidin B1                                      | Proanthocyanidins    | 9       | 9       | 9       | 32586    | 33526    | 30297    | 11.802              | 2.098 | up   |
| pme0436    | Procyanidin B3                                      | Proanthocyanidins    | 5969    | 4962    | 6514    | 294960   | 289060   | 307770   | 5.676               | 1.455 | up   |
| pme0434    | Procyanidin B2                                      | Proanthocyanidins    | 8679    | 12434   | 10420   | 192600   | 174760   | 171310   | 4.094               | 1.236 | up   |

**Table S4.** Differentially accumulated flavonoids between S4u and S4d.

| Index      | Compounds                                           | Class                | S4u-1  | S4u-2  | S4u-3  | S4d-1    | S4d-2    | S4d-3    | Log <sub>2</sub> FC | VIP   | Type |
|------------|-----------------------------------------------------|----------------------|--------|--------|--------|----------|----------|----------|---------------------|-------|------|
| pmf0027    | Cyanidin-3-O-galactoside                            | Anthocyanins         | 9      | 9      | 9      | 31856000 | 34635000 | 31909000 | 21.797              | 2.609 | up   |
| pmb0550    | Cyanidin-3-O-glucoside                              | Anthocyanins         | 9      | 9      | 9      | 4084000  | 3938100  | 4234600  | 18.792              | 2.422 | up   |
| pme3392    | Pelargonidin-3-O-glucoside                          | Anthocyanins         | 9      | 9      | 9      | 3552500  | 4508800  | 4163900  | 18.788              | 2.422 | up   |
| P4032      | Cyanidin-O-rutinoside-O-malonylglucoside            | Anthocyanins         | 9      | 9      | 9      | 2337800  | 2763300  | 2950000  | 18.186              | 2.383 | up   |
| P4329      | Peonidin-O-rutinoside-O-malonylglucoside            | Anthocyanins         | 9      | 9      | 9      | 415060   | 301820   | 306510   | 15.210              | 2.178 | up   |
| pmb0541    | Cyanidin-3-O-(6"-O-malonyl) glucoside-5-O-glucoside | Anthocyanins         | 62923  | 45400  | 42775  | 37900000 | 36958000 | 31467000 | 9.459               | 1.720 | up   |
| pme1793    | Pelargonidin-3,5-O-diglucoside                      | Anthocyanins         | 22466  | 21082  | 22129  | 2631800  | 2868400  | 2676700  | 6.960               | 1.474 | up   |
| HJN041     | Epicatechin glucoside                               | Catechin derivatives | 9      | 9      | 9      | 594570   | 592650   | 583960   | 16.001              | 2.235 | up   |
| pme0460    | Epicatechin                                         | Catechin derivatives | 26905  | 24890  | 24916  | 3235500  | 3181300  | 2947700  | 6.932               | 1.471 | up   |
| mws0054    | Catechin                                            | Catechin derivatives | 150760 | 147320 | 140080 | 1648900  | 1734700  | 1609200  | 3.510               | 1.047 | up   |
| mws0057    | Eriodictyol 7-O-glucoside                           | Flavanone            | 87136  | 126450 | 104500 | 9        | 9        | 9        | -13.524             | 2.053 | down |
| pmb0628    | Eriodictyol-8-C-glucoside-4'-O-glucoside            | Flavanone            | 55072  | 65933  | 62355  | 9        | 9        | 9        | -12.729             | 1.993 | down |
| mws1661    | Diosmin                                             | Flavone              | 9      | 9      | 9      | 3616000  | 3724200  | 3540800  | 18.620              | 2.411 | up   |
| pmb0592    | Chrysoeriol-7-O-rutinoside-5-O-glucoside            | Flavone              | 9      | 9      | 9      | 482210   | 429320   | 390490   | 15.557              | 2.204 | up   |
| HJN079     | Pinocembrin-7-O-rutinoside                          | Flavone              | 17473  | 15165  | 18007  | 9        | 9        | 9        | -10.873             | 1.842 | down |
| pmp000115  | Monohydroxy-hexamethoxyflavone                      | Flavone              | 16228  | 21198  | 11805  | 9        | 9        | 9        | -10.832             | 1.835 | down |
| Lmjp005224 | 4',5,7-Trihydroxy-3',3,6-Trimethoxyflavone          | Flavone              | 5166   | 8261   | 4297   | 9        | 9        | 9        | -9.358              | 1.703 | down |
| pmp000004  | 4',5,7-Trihydroxy-3',6-dimethoxyflavone             | Flavone              | 1770   | 4288   | 2453   | 9        | 9        | 9        | -8.300              | 1.597 | down |
| Zmhp004269 | Skullcapflavone II                                  | Flavone              | 12994  | 20114  | 13304  | 742      | 2885     | 1221     | -3.259              | 1.010 | down |
| pmb0672    | Apigenin-6-C-glucoside-7-O-(6"-feruloyl) glucoside  | Flavone C-glycosides | 9      | 9      | 9      | 446600   | 350350   | 422880   | 15.463              | 2.197 | up   |
| Lmjp002867 | Kaempferol-3-O-neohesperidoside                     | Flavonol             | 9      | 9      | 9      | 75154000 | 74620000 | 76817000 | 23.001              | 2.680 | up   |
| Lmpp003268 | Kaempferol-3-O-rutinoside-7-O-glucoside             | Flavonol             | 9      | 9      | 9      | 14299000 | 12173000 | 14185000 | 20.522              | 2.531 | up   |
| Lmyn001269 | Kaempferol-3-O-sophoroside                          | Flavonol             | 9      | 9      | 9      | 720580   | 964720   | 787060   | 16.483              | 2.265 | up   |
| Lmsn002815 | Kaempferol-3-O-rutinoside                           | Flavonol             | 18424  | 15872  | 16746  | 9        | 9        | 9        | -10.885             | 1.843 | down |

|            |                                        |                   |        |         |        |        |        |        |        |       |      |
|------------|----------------------------------------|-------------------|--------|---------|--------|--------|--------|--------|--------|-------|------|
| Lmyp005328 | Quercetin-3-O-(2"-cinnamoyl) glucoside | Flavonol          | 864580 | 1022900 | 927840 | 42031  | 46534  | 47335  | -4.373 | 1.168 | down |
| mws0836    | Procyanidin B1                         | Proanthocyanidins | 9      | 9       | 9      | 33399  | 32434  | 32555  | 11.831 | 1.922 | up   |
| pme0436    | Procyanidin B3                         | Proanthocyanidins | 6883   | 6370    | 7406   | 289070 | 257690 | 263390 | 5.293  | 1.286 | up   |
| pme0434    | Procyanidin B2                         | Proanthocyanidins | 7965   | 14027   | 9825   | 247020 | 260620 | 241440 | 4.557  | 1.195 | up   |

**Table S5.** List of 17 common compounds that were identified in four comparisons from S1 to S4.

| Index      | Compounds                                           | Class                | type |
|------------|-----------------------------------------------------|----------------------|------|
| P4032      | Cyanidin-O-rutinoside-O-malonylglucoside            | Anthocyanins         | up   |
| P4329      | Peonidin-O-rutinoside-O-malonylglucoside            | Anthocyanins         | up   |
| pmb0541    | Cyanidin-3-O-(6"-O-malonyl) glucoside-5-O-glucoside | Anthocyanins         | up   |
| pmb0550    | Cyanidin-3-O-glucoside                              | Anthocyanins         | up   |
| pme1793    | Pelargonidin-3,5-O-diglucoside                      | Anthocyanins         | up   |
| pme3392    | Pelargonidin-3-O-glucoside                          | Anthocyanins         | up   |
| pmf0027    | Cyanidin-3-O-galactoside                            | Anthocyanins         | up   |
| HJN041     | Epicatechin glucoside                               | Catechin derivatives | up   |
| pmb0628    | Eriodictyol-8-C-glucoside-4'-O-glucoside            | Flavanone            | down |
| mws1661    | Diosmin                                             | Flavone              | up   |
| pmb0592    | Chrysoeriol-7-O-rutinoside-5-O-glucoside            | Flavone              | up   |
| pmb0672    | Apigenin-6-C-glucoside-7-O-(6"-feruloyl) glucoside  | Flavone C-glycosides | up   |
| Lmjp002867 | Kaempferol-3-O-neohesperidoside                     | Flavonol             | up   |
| Lmpp003268 | Kaempferol-3-O-rutinoside-7-O-glucoside             | Flavonol             | up   |
| Lmyn001269 | Kaempferol-3-O-sophoroside                          | Flavonol             | up   |
| mws0836    | Procyanidin B1                                      | Proanthocyanidins    | up   |
| pme0434    | Procyanidin B2                                      | Proanthocyanidins    | up   |

**Table S6.** Carotenoids found in the blotch and non-blotch petal parts of *R. persica* at different stages of flower development ( $\mu\text{g}\cdot\text{g}^{-1}$ ).

| sample | phytoene | $\beta$ -carotene | $\beta$ -cryptoxanthin | lutein  | neoxanthin | zeaxanthin | violaxanthin | antheraxanthin | $\alpha$ -cryptoxanthin | $\gamma$ -carotene | capsanthin | $\varepsilon$ -carotene | lycopene | $\beta$ -apocarotenal |
|--------|----------|-------------------|------------------------|---------|------------|------------|--------------|----------------|-------------------------|--------------------|------------|-------------------------|----------|-----------------------|
| S1-1   | 1.290    | 21.800            | 1.640                  | 130.000 | 9.650      | 8.270      | 7.990        | NA             | 0.230                   | 0.096              | 0.002      | NA                      | NA       | 0.275                 |
| S1-2   | 1.180    | 21.800            | 1.830                  | 131.000 | 9.690      | 8.570      | 6.570        | NA             | 0.216                   | 0.081              | 0.002      | NA                      | NA       | 0.272                 |
| S1-3   | 1.080    | 21.400            | 1.550                  | 132.000 | 9.410      | 8.590      | 7.030        | NA             | 0.242                   | 0.083              | 0.002      | NA                      | NA       | 0.277                 |
| S2d-1  | 18.100   | 21.900            | 2.530                  | 138.000 | 10.500     | 16.100     | 35.700       | 7.090          | 0.100                   | 0.098              | 0.026      | NA                      | 0.104    | 0.279                 |
| S2d-2  | 17.528   | 21.870            | 2.354                  | 143.727 | 10.847     | 17.122     | 37.902       | 7.219          | 0.104                   | 0.097              | 0.027      | NA                      | 0.115    | 0.283                 |
| S2d-3  | 18.440   | 22.375            | 2.745                  | 139.444 | 10.943     | 15.799     | 35.161       | 6.892          | 0.100                   | 0.094              | 0.025      | NA                      | 0.109    | 0.281                 |
| S2u-1  | 55.700   | 26.400            | 3.300                  | 231.000 | 18.100     | 116.000    | 45.900       | 26.600         | 0.352                   | 0.203              | 0.095      | NA                      | 0.125    | 0.282                 |
| S2u-2  | 63.400   | 30.000            | 3.780                  | 262.000 | 20.100     | 138.000    | 52.700       | 29.500         | 0.384                   | 0.215              | 0.124      | NA                      | 0.140    | 0.291                 |
| S2u-3  | 60.700   | 26.700            | 3.450                  | 246.000 | 21.200     | 128.000    | 42.300       | 19.600         | 0.359                   | 0.206              | 0.120      | NA                      | 0.168    | 0.279                 |
| S3d-1  | 201.000  | 4.720             | 2.300                  | 55.700  | 5.690      | 35.000     | 86.400       | 21.700         | 0.114                   | 0.293              | 0.053      | 0.032                   | 0.199    | 0.276                 |
| S3d-2  | 204.000  | 4.830             | 2.260                  | 59.100  | 5.370      | 35.900     | 86.200       | 22.400         | 0.110                   | 0.287              | 0.054      | 0.042                   | 0.196    | 0.279                 |
| S3d-3  | 212.000  | 4.600             | 2.380                  | 56.700  | 5.630      | 28.500     | 86.500       | 21.800         | 0.107                   | 0.277              | 0.045      | 0.039                   | 0.187    | 0.275                 |
| S3u-1  | 3150.000 | 9.730             | 3.880                  | 96.300  | 15.900     | 255.000    | 30.700       | 115.000        | 0.280                   | 1.640              | 0.197      | 0.481                   | 0.643    | 0.295                 |
| S3u-2  | 3320.000 | 8.910             | 4.110                  | 98.600  | 12.600     | 279.000    | 26.700       | 107.000        | 0.332                   | 1.360              | 0.196      | 0.460                   | 0.623    | 0.308                 |
| S3u-3  | 3520.000 | 9.250             | 4.090                  | 104.000 | 13.700     | 293.000    | 25.600       | 108.000        | 0.311                   | 1.320              | 0.228      | 0.498                   | 0.667    | 0.303                 |
| S4d-1  | 195.000  | 3.370             | 2.030                  | 56.700  | 5.940      | 42.100     | 93.900       | 13.300         | 0.096                   | 0.226              | 0.040      | 0.027                   | 0.174    | 0.270                 |
| S4d-2  | 186.000  | 3.340             | 1.950                  | 56.000  | 5.820      | 41.800     | 83.600       | 14.200         | 0.108                   | 0.258              | 0.044      | 0.032                   | 0.176    | 0.282                 |
| S4d-3  | 203.000  | 3.220             | 2.130                  | 56.500  | 4.930      | 40.000     | 85.300       | 14.000         | 0.093                   | 0.268              | 0.042      | 0.022                   | 0.169    | 0.278                 |
| S4u-1  | 3670.000 | 8.820             | 4.280                  | 113.000 | 12.200     | 226.000    | 97.800       | 91.600         | 0.271                   | 1.310              | 0.165      | 0.519                   | 0.815    | 0.328                 |
| S4u-2  | 3380.000 | 8.930             | 4.310                  | 112.000 | 13.100     | 229.000    | 84.300       | 89.300         | 0.313                   | 1.160              | 0.157      | 0.507                   | 0.746    | 0.332                 |
| S4u-3  | 3340.000 | 8.460             | 4.830                  | 113.000 | 13.500     | 228.000    | 110.000      | 87.800         | 0.307                   | 1.340              | 0.143      | 0.436                   | 0.770    | 0.332                 |

**Table S7.** The quality analysis of all reads from 21 samples.

| Sample | Raw Reads  | Clean Reads | Q20 (%) | Q30 (%) | GC content (%) | Unique mapped (%) | Total mapped (%) |
|--------|------------|-------------|---------|---------|----------------|-------------------|------------------|
| S1-1   | 48,864,716 | 48,784,312  | 97.88   | 93.85   | 47.92          | 89.80             | 91.52            |
| S1-2   | 51,725,866 | 51,645,294  | 97.97   | 94.06   | 47.54          | 94.55             | 96.29            |
| S1-3   | 48,906,146 | 48,828,742  | 97.85   | 93.81   | 47.92          | 94.17             | 95.84            |
| S2d-1  | 50,271,726 | 50,189,752  | 98.00   | 94.16   | 47.46          | 93.75             | 95.48            |
| S2d-2  | 52,489,208 | 52,398,068  | 97.99   | 94.12   | 47.36          | 94.65             | 96.39            |
| S2d-3  | 52,210,140 | 52,127,586  | 98.12   | 94.45   | 47.48          | 93.92             | 95.65            |
| S2u-1  | 45,593,070 | 45,512,664  | 97.92   | 93.96   | 47.24          | 93.85             | 95.64            |
| S2u-2  | 52,449,452 | 52,375,070  | 98.05   | 94.27   | 47.13          | 94.25             | 96.11            |
| S2u-3  | 57,340,612 | 57,227,586  | 98.00   | 94.22   | 47.32          | 94.87             | 96.74            |
| S3d-1  | 55,539,362 | 55,449,576  | 98.24   | 94.68   | 47.29          | 93.86             | 95.81            |
| S3d-2  | 52,698,274 | 52,610,422  | 98.02   | 94.21   | 47.02          | 93.59             | 95.47            |
| S3d-3  | 46,811,072 | 46,746,760  | 98.07   | 94.26   | 47.29          | 93.86             | 95.74            |
| S3u-1  | 44,697,182 | 44,628,268  | 98.06   | 94.24   | 46.98          | 93.94             | 96.03            |
| S3u-2  | 41,540,316 | 41,466,920  | 97.97   | 94.03   | 46.68          | 92.53             | 94.65            |
| S3u-3  | 47,802,558 | 47,715,316  | 97.49   | 92.85   | 46.70          | 93.42             | 95.52            |
| S4d-1  | 43,514,304 | 43,447,968  | 98.01   | 94.17   | 47.32          | 93.74             | 96.14            |
| S4d-2  | 45,281,740 | 45,205,406  | 97.99   | 94.14   | 48.12          | 92.41             | 94.68            |
| S4d-3  | 43,759,148 | 43,687,222  | 98.02   | 94.19   | 47.68          | 92.60             | 94.91            |
| S4u-1  | 39,959,482 | 39,898,184  | 98.17   | 94.55   | 47.42          | 93.60             | 96.32            |
| S4u-2  | 43,497,460 | 43,416,262  | 97.97   | 94.09   | 47.31          | 93.94             | 96.64            |
| S4u-3  | 48,858,026 | 48,749,510  | 98.02   | 94.21   | 48.41          | 93.26             | 95.67            |

**Table S8.** Correlation analysis of seven anthocyanins and flavonoid-related DEGs.

| Anthocyanins | DEGs      | Correlation | <i>P</i> -Value |
|--------------|-----------|-------------|-----------------|
| pmb0541      | Rbe016466 | 0.942       | 0.002           |
| pmb0541      | Rbe028518 | 0.926       | 0.003           |
| pmf0027      | Rbe026328 | 0.888       | 0.008           |
| pmb0550      | Rbe016466 | 0.863       | 0.012           |
| pmf0027      | Rbe016466 | 0.858       | 0.013           |
| pmb0550      | Rbe026328 | 0.854       | 0.014           |
| pmf0027      | Rbe013916 | 0.806       | 0.028           |
| pme1793      | Rbe028518 | 0.800       | 0.031           |
| pme3392      | Rbe026328 | 0.773       | 0.041           |
| pmb0550      | Rbe013916 | 0.773       | 0.041           |
| pmb0541      | Rbe014123 | 0.769       | 0.043           |
| pmb0550      | Rbe028518 | 0.768       | 0.044           |
| pme1793      | Rbe016466 | 0.763       | 0.046           |
| pmf0027      | Rbe014123 | 0.757       | 0.049           |
| pme3392      | Rbe016466 | 0.753       | 0.051           |

**Table S9.** Transcription factors identified in the cyan and saddlebrown modules.

| GeneID    | Module | Symbol | TF family   | Description                                                |
|-----------|--------|--------|-------------|------------------------------------------------------------|
| Rbe024976 | cyan   | NAC100 | NAC         | NAC domain containing protein 50-like [Rosa chinensis]     |
| Rbe009491 | cyan   | MYB4   | MYB_related | transcription factor MYB4-like [Rosa chinensis]            |
| Rbe009787 | cyan   | ZAT9   | C2H2        | zinc finger protein 197 [Prunus persica]                   |
| Rbe015696 | cyan   | NAC083 | NAC         | NAC domain-containing protein 83-like [Rosa chinensis]     |
| Rbe006355 | cyan   | HHO5   | G2-like     | transcription factor HHO5-like isoform X1 [Rosa chinensis] |
| Rbe028685 | cyan   | WIP2   | C2H2        | zinc finger protein WIP2 [Rosa chinensis]                  |

|             |             |         |             |                                                                                   |
|-------------|-------------|---------|-------------|-----------------------------------------------------------------------------------|
| Rbe010942   | cyan        | MYB73   | MYB         | transcription factor MYB44-like [Rosa chinensis]                                  |
| Rbe009701   | cyan        | MADS2   | MADS        | developmental protein SEPALLATA 1-like isoform X1 [Rosa chinensis]                |
| Rbe005681   | cyan        | MYB123  | MYB         | anthocyanin regulatory C1 protein-like [Rosa chinensis]                           |
| Rbe024880   | cyan        | MYB1    | MYB         | MYB5 [Rosa rugosa]                                                                |
| Rbe006322   | cyan        | DOF5.3  | DOF         | dof zinc finger protein DOF3.4-like [Rosa chinensis]                              |
| Rbe021770   | cyan        | MYB62   | MYB         | transcription factor MYB24 [Rosa chinensis]                                       |
| Rbe009935   | cyan        | ATHB-20 | HD-ZIP      | homeobox-leucine zipper protein HAT7 [Rosa chinensis]                             |
| MSTRG.22677 | cyan        | MYB3    | MYB3        | transcription factor MYB3-like [Rosa chinensis]                                   |
| Rbe014352   | cyan        | MYB73   | MYB         | transcription factor MYB44-like [Rosa chinensis]                                  |
| Rbe014309   | cyan        | GATA12  | GATA        | GATA transcription factor 12 [Rosa chinensis]                                     |
| Rbe028610   | cyan        | PHL5    | G2-like     | myb family transcription factor PHL5 isoform X1 [Rosa chinensis]                  |
| Rbe015934   | cyan        | MYB86   | MYB         | transcription factor MYB86-like [Rosa chinensis]                                  |
| Rbe002625   | cyan        | WIP3    | C2H2        | zinc finger protein WIP3 [Rosa chinensis]                                         |
| Rbe003454   | cyan        | BLH8    | TALE        | BEL1-like homeodomain protein 8 [Rosa chinensis]                                  |
| Rbe027753   | cyan        | WDR44   | WDR44       | WD repeat-containing protein 44-like [Rosa chinensis]                             |
| Rbe006154   | cyan        | RL3     | MYB_related | PREDICTED: protein RADIALIS-like 4 [Fragaria vesca subsp. vesca] [Fragaria vesca] |
| Rbe008908   | saddlebrown | MADS1   | MADS        | floral homeotic protein AGAMOUS isoform X2 [Rosa chinensis]                       |
| Rbe013941   | saddlebrown | BLH3    | TALE        | BEL1-like homeodomain protein 3 isoform X2 [Rosa chinensis]                       |
| Rbe021137   | saddlebrown | BHLH147 | bHLH        | transcription factor bHLH147-like [Rosa chinensis]                                |
| Rbe024860   | saddlebrown | ERF023  | ERF         | ethylene-responsive transcription factor ERF023 isoform X2 [Rosa chinensis]       |
| Rbe026320   | saddlebrown | VRN1    | B3          | B3 domain-containing transcription factor VRN1-like [Rosa chinensis]              |

**Table S10.** Correlation analysis of seven anthocyanins and transcription factors in the cyan module.

| Anthocyanins | DEGs      | Correlation | P-Value |
|--------------|-----------|-------------|---------|
| pmb0541      | Rbe003454 | 0.967       | 0.000   |
| pmf0027      | Rbe021770 | 0.939       | 0.002   |
| pmb0541      | Rbe021770 | 0.938       | 0.002   |

|         |             |       |       |
|---------|-------------|-------|-------|
| pmb0550 | Rbe021770   | 0.935 | 0.002 |
| pmb0541 | Rbe015934   | 0.928 | 0.003 |
| pmb0541 | Rbe028610   | 0.919 | 0.003 |
| pmb0541 | Rbe027753   | 0.908 | 0.005 |
| pmf0027 | Rbe009701   | 0.906 | 0.005 |
| pmb0550 | Rbe009701   | 0.882 | 0.009 |
| pme1793 | Rbe003454   | 0.879 | 0.009 |
| pmb0541 | MSTRG.22677 | 0.877 | 0.010 |
| pmb0541 | Rbe009935   | 0.862 | 0.013 |
| pmb0541 | Rbe006154   | 0.855 | 0.014 |
| pmf0027 | Rbe006154   | 0.851 | 0.015 |
| pmb0550 | Rbe006154   | 0.838 | 0.019 |
| pmb0541 | Rbe002625   | 0.837 | 0.019 |
| pme3392 | Rbe021770   | 0.837 | 0.019 |
| pmb0550 | Rbe003454   | 0.837 | 0.019 |
| P4329   | MSTRG.22677 | 0.831 | 0.020 |
| pme3392 | Rbe003454   | 0.820 | 0.024 |
| pme1793 | Rbe021770   | 0.817 | 0.025 |
| pmb0550 | Rbe028610   | 0.809 | 0.027 |
| pmb0550 | Rbe015934   | 0.805 | 0.029 |
| pmb0541 | Rbe009701   | 0.803 | 0.030 |
| pmf0027 | Rbe003454   | 0.803 | 0.030 |

**Table S11.** Primers used for the qRT-PCR analysis.

| Gene ID        | Gene name    | Forward primer (5' to 3') | Reverse primer (5' to 3') |
|----------------|--------------|---------------------------|---------------------------|
| Reference gene | <i>GAPDH</i> | GGTCAAGGTCATTGCTTGGT      | GGATCGATCACATCGACAGA      |
| Rbe013916      | <i>DFR</i>   | TCTCCGATCATCACCTCTATCCTTA | TGCCTTCCACAGCGTCAA        |

|             |              |                         |                         |
|-------------|--------------|-------------------------|-------------------------|
| Rbe016466   | <i>ANS</i>   | CCCAAAGAGGAGCTCATTAACA  | TGATGTCCTCGGAGTCTATCTC  |
| Rbe26328    | <i>UFGT</i>  | TGTTGTTGTCGGAGATGGCT    | GAGACCACAAGAATGGAACCC   |
| Rbe028518   | <i>4CL</i>   | TCGGTATCTTACTCGGA ACTCT | CCAAGAACACAACGGGATAGT   |
| Rbe014123   | <i>4CL</i>   | TCCTCTCTCCCAACTCAATCT   | TCGAATCTGCGACCTGTTTAG   |
| MSTRG.22677 | <i>MYB</i>   | GGTAAGAGTTGTCGACTGAGATG | CACCTATTCCCAAGGAGTGTATG |
| Rbe009701   | <i>MADS2</i> | CTGAGGTTGCTCTCATCATCTT  | TTGACTTCCACTGCACCATAG   |
| Rbe009935   | <i>HDZIP</i> | AAGCAGCTGGAGAAAGACTATG  | CAGCCTGAAGTTTCTTGTTGTG  |
